# Supplementary material for: The first example of a Pt⋯Pt interaction in platinum(ii) complexes bearing bulky tri-tert-butyl-2,2′:6′,2″-terpyridine pendants via conformational control of the calix[4]arene moiety
Source: Royal Society of Chemistry journal article supplement (doi:10.1039/b712645j), 2007-01-01

## Supporting Information

# First Example of Pt...Pt Interaction in Platinum(II) Complexes Bearing Bulky Tri-*tert*-butyl-2,2':6',2''-Terpyridine Pendants *via* Conformational Control of the Calix[4]arene Moiety

Hiu-Suet Lo, Sung-Kong Yip, Nianyong Zhu and Vivian Wing-Wah  
Yam\*

Centre for Carbon-Rich Molecular and Nano-Scale Metal-Based Materials Research, and  
Department of Chemistry, The University of Hong Kong, Pokfulam Road, Hong Kong, P.  
R. China.

Fax: +(852) 2857-1586

Tel: + (852) 2859-2153

E-mail: wwyam@hku.hk

**Fig. S1** Synthetic route of **L**

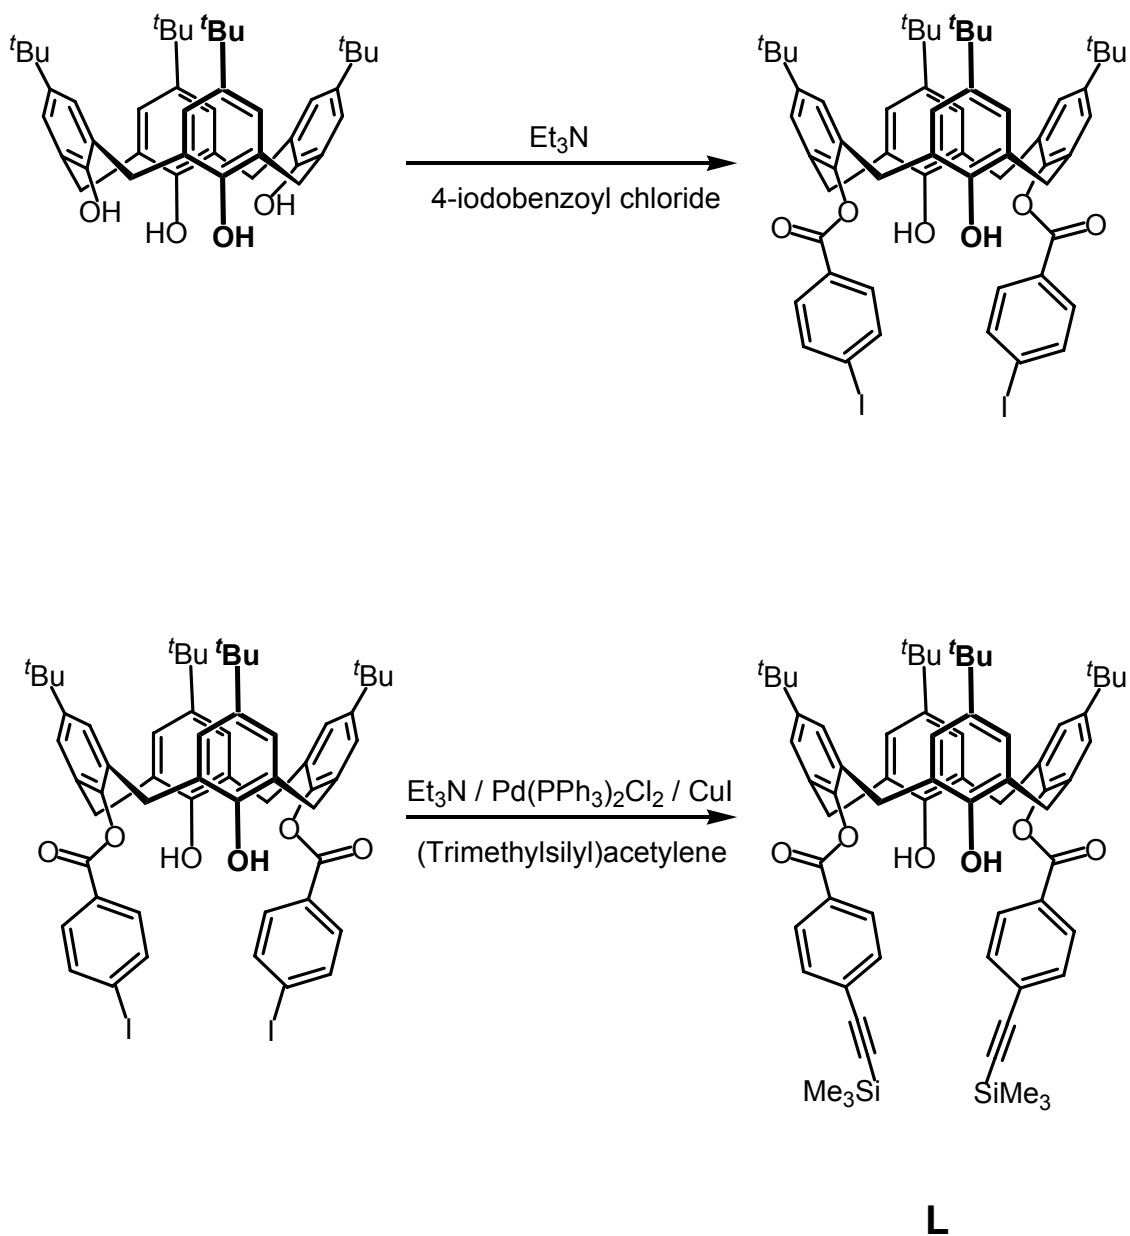

**Characterisation of 25,27-di(iodobenzoyl)-26,28-dihydroxy-*p*-tert-butylcalix[4]arene**

$^1\text{H}$  NMR (400 MHz,  $\text{CDCl}_3$ , 298 K, relative to  $\text{SiMe}_3$ )/ppm:  $\delta$  1.00 (s, 18H,  $^t\text{Bu}$ ), 1.17 (s, 18H,  $^t\text{Bu}$ ), 3.50 (d, 4H,  $J = 14.1$  Hz,  $-\text{CH}_2-$ ), 3.89 (d, 4H,  $J = 14.1$  Hz,  $-\text{CH}_2-$ ), 5.05 (s, 2H,  $-\text{OH}$ ), 6.91 (s, 4H,  $-\text{C}_6\text{H}_2$ ), 7.01 (s, 4H,  $-\text{C}_6\text{H}_2$ ), 7.88 (d, 4H,  $J = 8.3$  Hz,  $-\text{C}_6\text{H}_4$ ), 8.02 (d, 4H,  $J = 8.3$  Hz,  $-\text{C}_6\text{H}_4$ ). Positive-ion FAB-MS:  $m/z$  1108  $[\text{M}]^+$ . Anal. Calc. for  $\text{C}_{58}\text{H}_{62}\text{I}_2\text{O}_6 \cdot 1/2 \text{C}_6\text{H}_{14}$ : C, 63.60; H, 6.04. Found: C, 63.51; H, 6.08.

**Characterisation of L**

$^1\text{H}$  NMR (400 MHz,  $\text{CDCl}_3$ , 298 K, relative to  $\text{SiMe}_3$ )/ppm:  $\delta$  0.32 (s, 18H,  $-\text{SiMe}_3$ ), 1.00 (s, 18H,  $^t\text{Bu}$ ), 1.23 (s, 18H,  $^t\text{Bu}$ ), 3.45 (d, 4H,  $J = 14.1$  Hz,  $-\text{CH}_2-$ ), 3.93 (d, 4H,  $J = 14.1$  Hz,  $-\text{CH}_2-$ ), 5.03 (s, 2H,  $-\text{OH}$ ), 6.86 (s, 4H,  $-\text{C}_6\text{H}_2$ ), 7.04 (s, 4H,  $-\text{C}_6\text{H}_2$ ), 7.60 (d, 4H,  $J = 8.3$  Hz,  $-\text{C}_6\text{H}_4$ ), 8.27 (d, 4H,  $J = 8.3$  Hz,  $-\text{C}_6\text{H}_4$ ). IR (KBr disc,  $\nu/\text{cm}^{-1}$ ): 2160 (m),  $\nu(\text{C}\equiv\text{C})$ ; 1746 (s),  $\nu(\text{C}=\text{O})$ . Positive-ion FAB-MS:  $m/z$  905  $[\text{M} - 2\text{SiMe}_3]^+$ . Anal. Calc. for  $\text{C}_{68}\text{H}_{80}\text{O}_6\text{Si}_2$ : C, 77.82; H, 7.68. Found: C, 77.72; H, 7.47.

**Characterisation of Complex 1**

$^1\text{H}$  NMR (400 MHz,  $\text{CD}_3\text{CN}$ , 298 K, relative to  $\text{SiMe}_3$ )/ppm:  $\delta$  1.02 (s, 18H,  $^t\text{Bu}$ ), 1.20 (s, 18H,  $^t\text{Bu}$ ), 1.37 (s, 36H,  $^t\text{Bu}$ ), 1.43 (s, 18H,  $^t\text{Bu}$ ), 3.45 (d, 4H,  $J = 14.0$  Hz,  $-\text{CH}_2-$ ), 4.00 (d, 4H,  $J = 14.0$  Hz,  $-\text{CH}_2-$ ), 5.73 (s, 2H,  $-\text{OH}$ ), 6.95 (s, 4H,  $-\text{C}_6\text{H}_2$ ), 7.07 (s, 4H,  $-\text{C}_6\text{H}_2$ ), 7.60 (dd, 4H,  $J = 2.0$  and  $6.0$  Hz,  $-\text{trpy}$ ), 7.72 (d, 4H,  $J = 8.4$  Hz,  $-\text{C}_6\text{H}_4$ ), 8.35 (m, 8H,  $-\text{trpy}$ ), 8.42 (d, 4H,  $J = 8.4$  Hz,  $-\text{C}_6\text{H}_4$ ), 9.10 (d, 4H,  $J = 6$  Hz,  $-\text{trpy}$ ). IR (KBr disc,  $\nu/\text{cm}^{-1}$ ): 2117 (m),  $\nu(\text{C}\equiv\text{C})$ ; 1736 (s),  $\nu(\text{C}=\text{O})$ . Positive-ion FAB-MS:  $m/z$  2097  $[\text{M} - 2\text{OTf}]^+$ . Anal. Calc. for  $\text{C}_{118}\text{H}_{132}\text{O}_{12}\text{Pt}_2\text{N}_6\text{S}_2\text{F}_6$ : C, 59.18; H, 5.56; N, 3.51. Found: C, 58.99; H, 5.58; N, 3.73.

**Characterisation of Complex 2**

$^1\text{H}$  NMR (400 MHz,  $\text{CD}_3\text{CN}$ , 298 K, relative to  $\text{SiMe}_3$ )/ppm:  $\delta$  1.18 (s, 18H,  $^t\text{Bu}$ ), 1.27 (s, 18H,  $^t\text{Bu}$ ), 3.59 (d, 4H,  $J = 13.8$  Hz,  $-\text{CH}_2-$ ), 4.08 (d, 4H,  $J = 13.8$  Hz,  $-\text{CH}_2-$ ), 6.25 (s, 2H,  $-\text{OH}$ ), 7.28 (s, 4H,  $-\text{C}_6\text{H}_2$ ), 7.30 (s, 4H,  $-\text{C}_6\text{H}_2$ ), 7.57 (d, 4H,  $J = 8.2$  Hz,  $-\text{C}_6\text{H}_4$ ), 7.61 (m, 4H,  $-\text{trpy}$ ), 7.80 (d, 8H,  $J = 8.0$  Hz,  $-\text{trpy}$ ), 8.16 – 8.33 (m, 6H,  $-\text{trpy}$ ), 8.49 (d, 4H,  $J = 8.2$  Hz,  $-\text{C}_6\text{H}_4$ ), 8.84 (d, 4H,  $J = 6$  Hz,  $-\text{trpy}$ ). IR (KBr disc,  $\nu/\text{cm}^{-1}$ ): 2120 (m),  $\nu(\text{C}\equiv\text{C})$ ; 1731 (s),  $\nu(\text{C}=\text{O})$ . Positive-ion FAB-MS:  $m/z$  1760  $[\text{M} - 2\text{OTf}]^+$ . Anal. Calc. for  $\text{C}_{94}\text{H}_{86}\text{O}_{12}\text{Pt}_2\text{N}_6\text{S}_2\text{F}_6 \cdot \text{CHCl}_3$ : C, 52.37; H, 4.03; N, 3.86. Found: C, 52.29; H, 4.14; N, 4.09.

**Fig S2.** UV-vis absorption spectra of complex **1** (—) and **2** (—) in acetonitrile solution at 298 K.

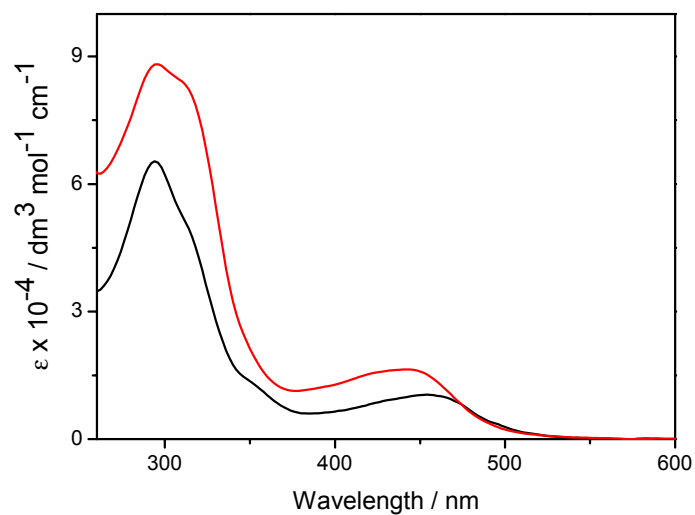

**Fig S3.** Normalized emission spectra of the powder form of **1** at 298 K (—) and 77 K (—) and the crystalline form at 298 K (—) and 77 K (—) in the solid state.

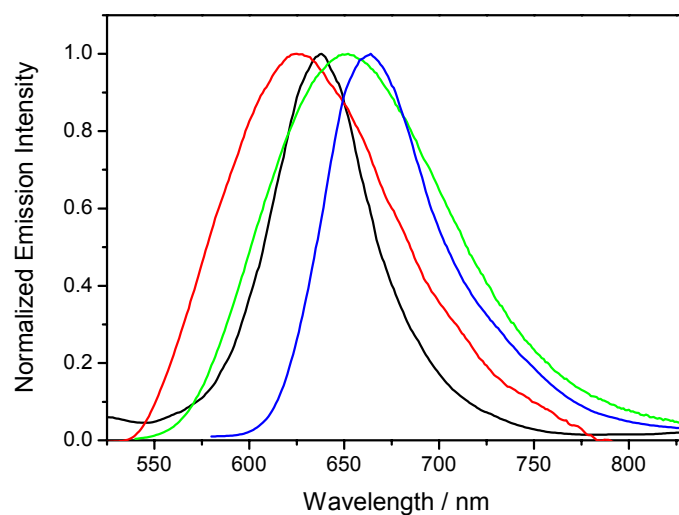

Supplement: b712645j.pdf [file b712645j.pdf]
